# Supplementary material for: Robust superhydrophilic patterning of superhydrophobic ormosil surfaces for high-throughput on-chip screening applications
Source: Royal Society of Chemistry journal article supplement (doi:10.1039/c6ra19669a), 2016-01-01
Supplement: c6ra19669a1.pdf [file c6ra19669a1.pdf]

## Electronic Supplementary Information

### **Robust superhydrophilic patterning of superhydrophobic ORMOSIL surfaces for high-throughput on-chip screening applications**

Pinar Beyazkılıç,<sup>ab</sup> Urandelger Tuvshindorj,<sup>ab</sup> Adem Yildirim,<sup>ab</sup> Çağlar Elbuken<sup>ab</sup> and Mehmet Bayındır<sup>\*abc</sup>

<sup>a</sup>UNAM-National Nanotechnology Research Centre, Bilkent University, 06800 Ankara, Turkey

<sup>b</sup>Institute of Materials Science and Nanotechnology, Bilkent University, 06800 Ankara, Turkey

<sup>c</sup>Department of Physics, Bilkent University, 06800, Ankara, Turkey

\*E-mail: [bayindir@nano.org.tr](mailto:bayindir@nano.org.tr)

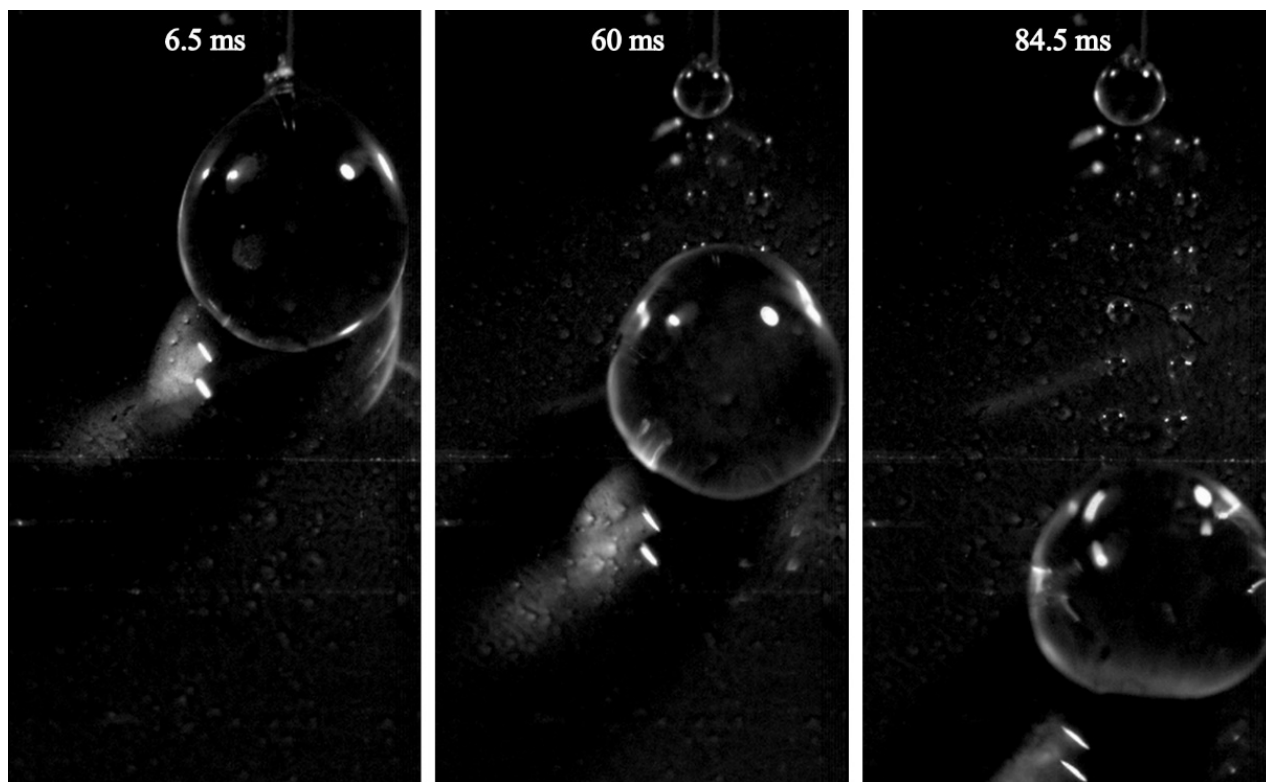

**Fig. S1** Snapshots from high-speed recording (see Video SV1) at 6.5<sup>th</sup>, 60<sup>th</sup>, and 84.5<sup>th</sup> milliseconds (ms) for the surface with 200  $\mu\text{m}$  circular patterns.

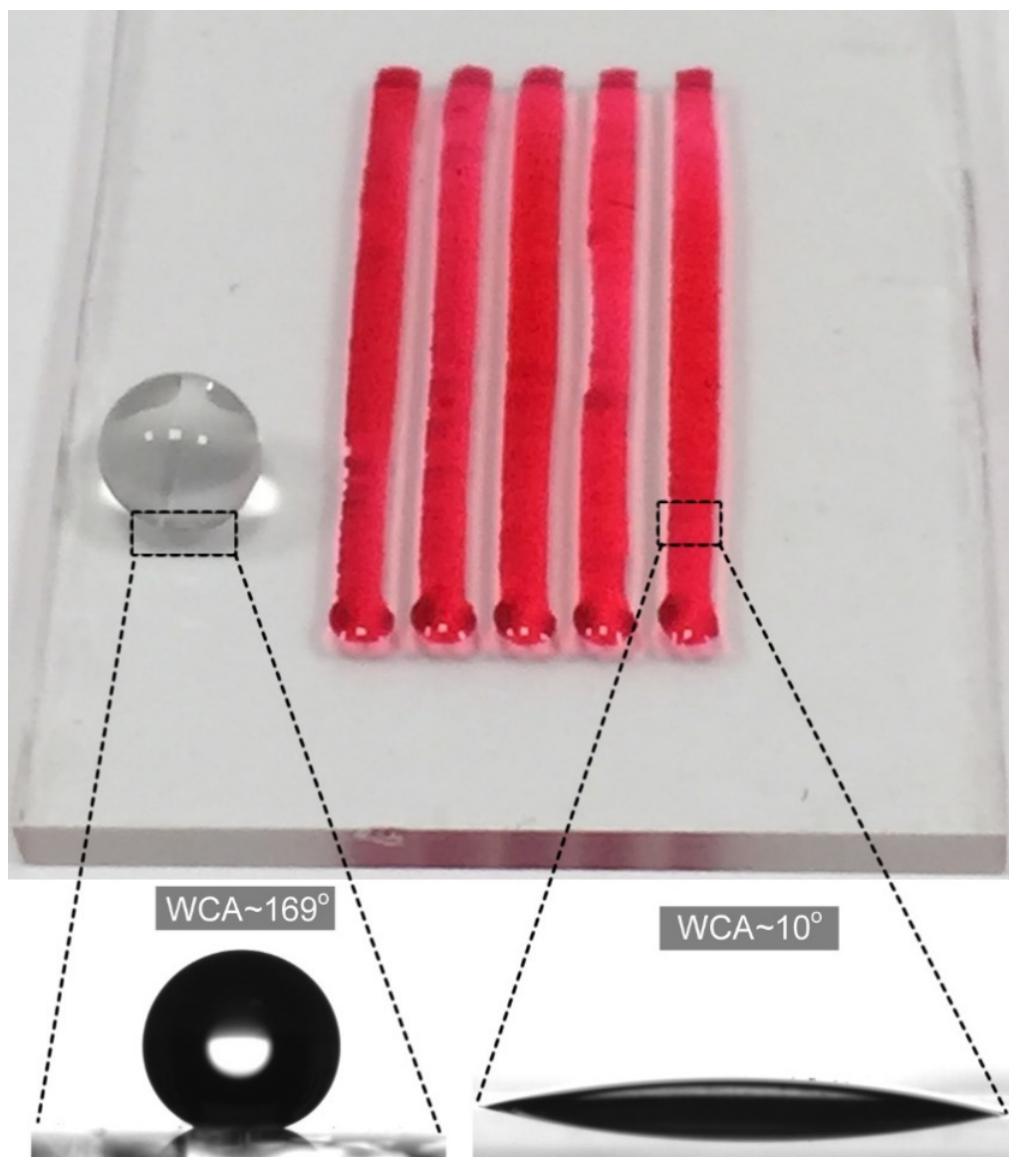

**Fig. S2** Patterned ormosil surface after 5 month-storage period. Spherical droplet on the superhydrophobic region and rhodamine 6G aqueous solution on the superhydrophilic stripe patterns with corresponding WCA values.

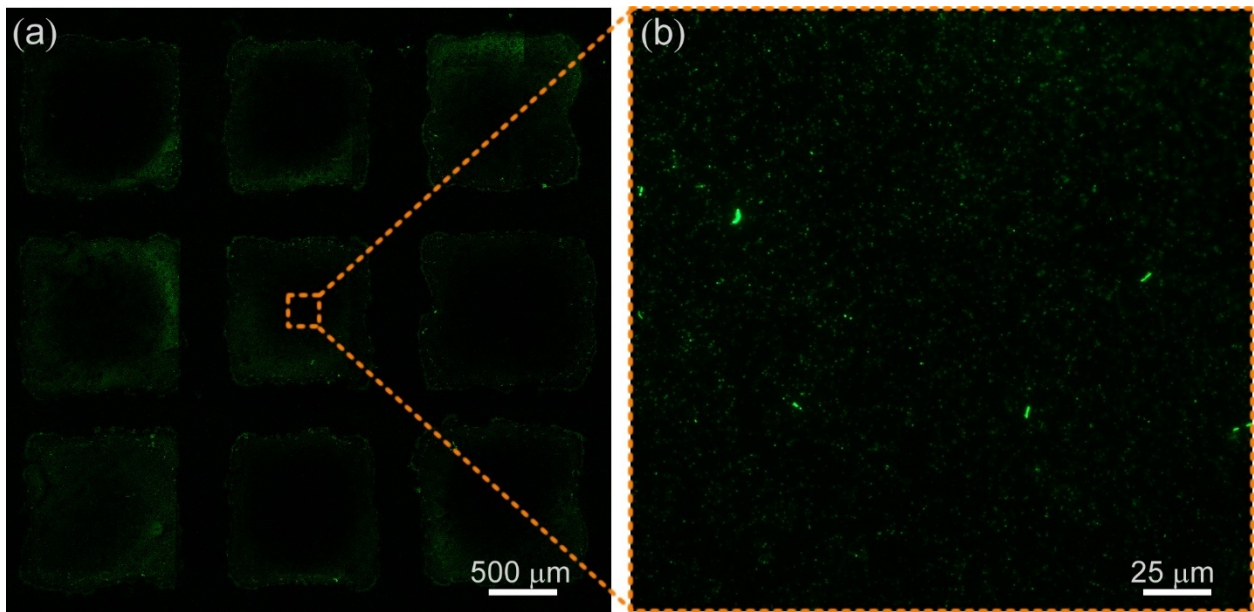

**Fig. S3** (a) Fluorescent microscope image of GFP-expressing *E. coli* cells on the superhydrophilic patterns of ORMOSIL with square wetted patterns (1x1 mm) (b) Close-up view of one wetted pattern with adhered bacteria. Fluorescent signal of GFP from individual bacteria cells with  $\sim 2 \mu\text{m}$  dimensions were clearly observed.
